# Supplementary material for: The Microtubule Destabilizer Eribulin Synergizes with STING Agonists to Promote Antitumor Efficacy in Triple-Negative Breast Cancer Models
Source: MDPI journal article supplement (doi:10.3390/cancers14235962), 2022-12-02

# Figure S1

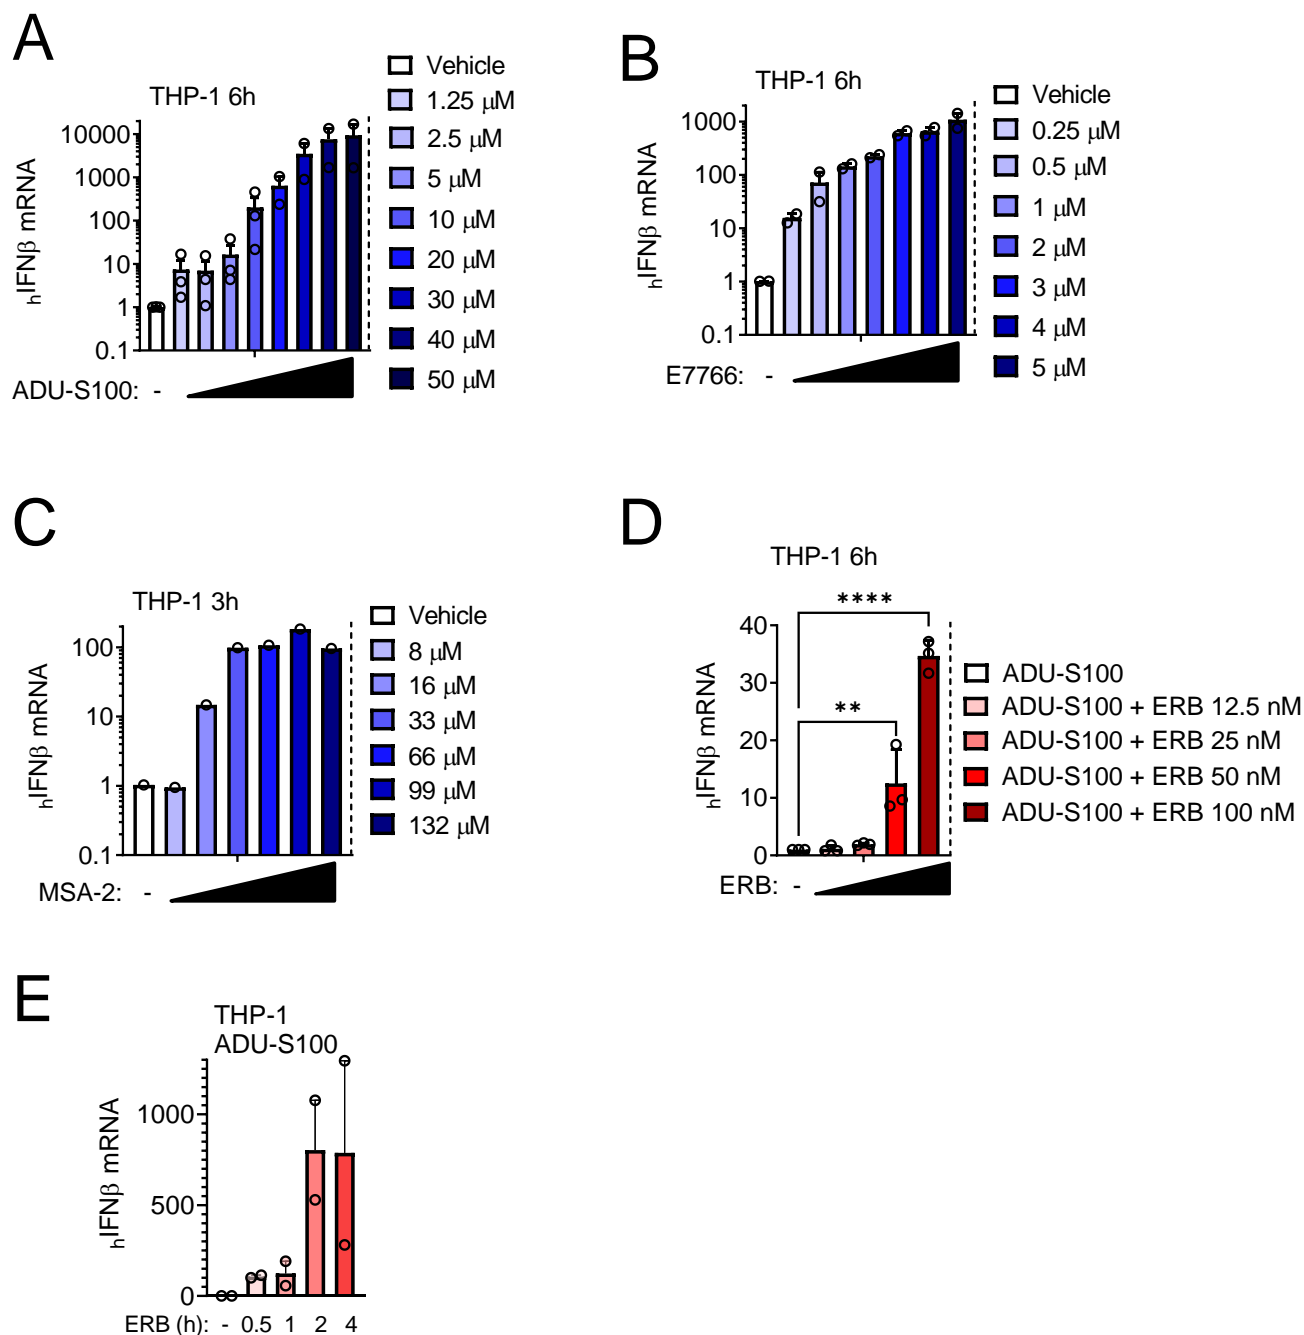

**Figure S1.** Concentration-dependence of STING agonists and eribulin on IFN $\beta$  expression in THP-1 cells. Human IFN $\beta$  mRNA expression in THP-1 cells treated with indicated concentrations of (A) ADU-S100 for 6 h, (B) E7766 for 6 h, or (C) MSA-2 for 3 h. (D) Human IFN $\beta$  mRNA expression in THP-1 cells treated with 10  $\mu$ M ADU-S100 and indicated concentrations of eribulin (ERB) for 6 h. (E) Human IFN $\beta$  mRNA expression in THP-1 cells treated with 10  $\mu$ M ADU-S100 for 6 h in combination with 100 nM ERB added for the indicated duration during the 6 h ADU-S100 treatment. Significance of eribulin determined by one-way ANOVA with Dunnett's posthoc test comparing all conditions to ADU-S100 alone. \*\* $p < 0.01$ , \*\*\*\* $p < 0.0001$ .

# Figure S2

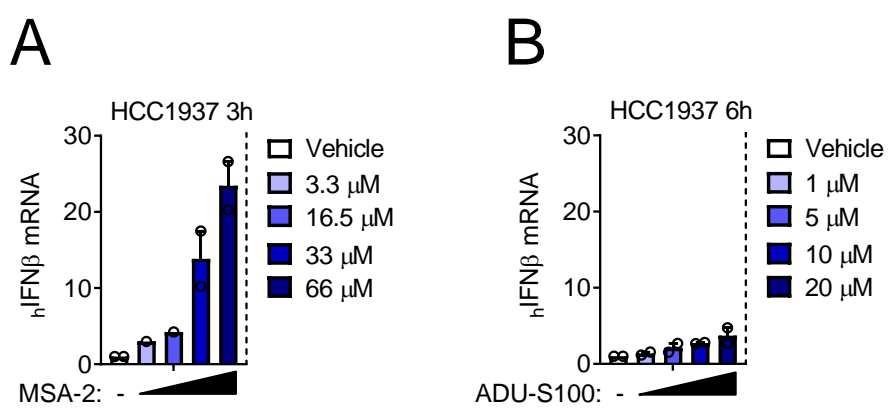

**Figure S2.** Concentration-dependence of STING agonists on IFN $\beta$  expression in HCC1937 TNBC cells. Human *IFN $\beta$*  mRNA expression in HCC1937 cells treated with indicated concentrations of (A) MSA-2 for 3 h or (B) ADU-S100 for 6 h.

# Figure S3

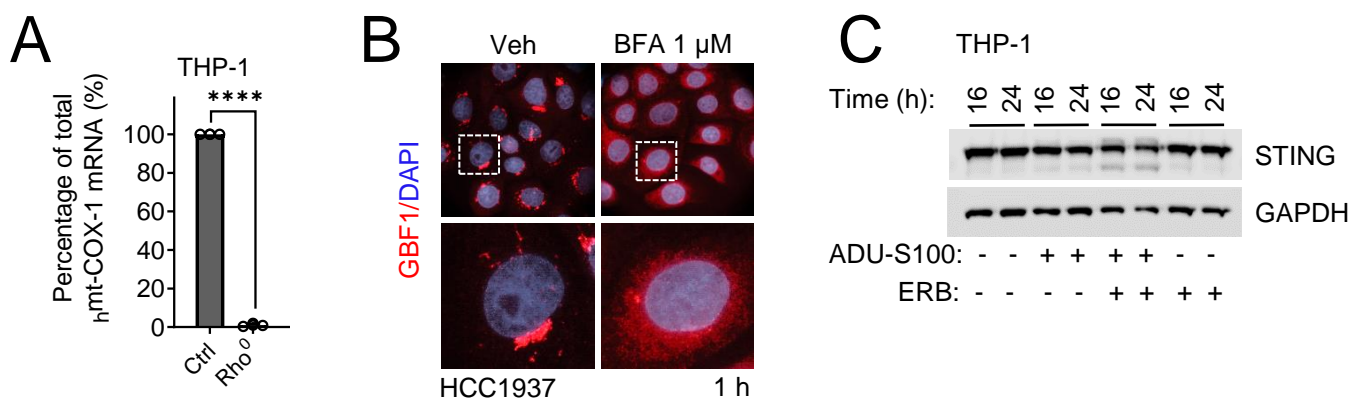

**Figure S3.** Eribulin's effect on the canonical STING signaling pathway. **(A)** Expression of the mitochondrially-encoded human cytochrome c oxidase subunit 1 (*COX-1*) mRNA in control and ethidium bromide (EtBr) cultured THP-1 cells (Rho<sup>0</sup>). Significance is determined by paired t-test. \*\*\*\**p* < 0.0001. **(B)** Immunofluorescence images of the cis-Golgi marker GBF1 and DAPI in HCC1937 cells treated with 1  $\mu$ M BFA for 1 h. The white box insert represents an enlarged representative cell for detail, below. **(C)** Immunoblot of STING and GAPDH in THP-1 cells treated with 10  $\mu$ M ADU-S100 with or without 100 nM ERB for 16 or 24 h.

# Figure S4

STING  
Cell Lines: THP-1, HCC1937, HCC1806, MDA-MB-453  
MW: 35 kDa

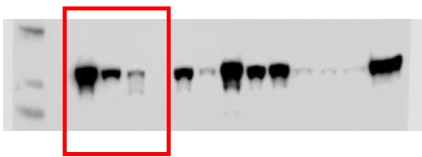

GAPDH  
Cell Lines: THP-1, HCC1937, HCC1806, MDA-MB-453  
MW: 36 kDa

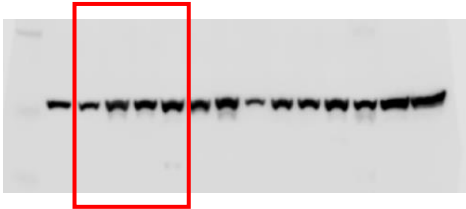

TBK1  
Cell Line: THP-1  
MW: 84 kDa

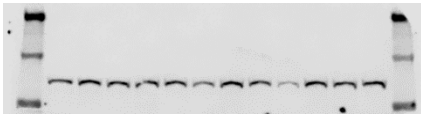

IRF3  
Cell Line: THP-1  
MW: 47 kDa

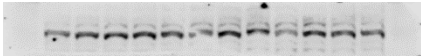

P-TBK1  
Cell Line: THP-1  
MW: 84 kDa

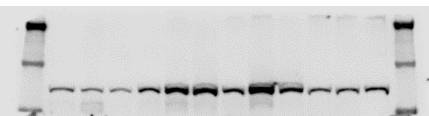

P-IRF3  
Cell Line: THP-1  
MW: 47 kDa

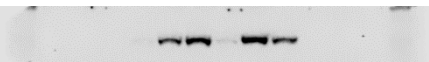

GAPDH  
Cell Line: THP-1  
MW: 36 kDa

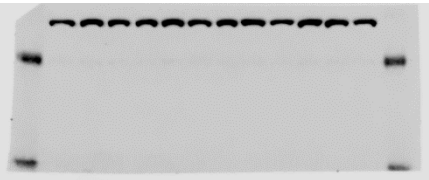

P-STING  
Cell Line: THP-1  
MW: 40 kDa

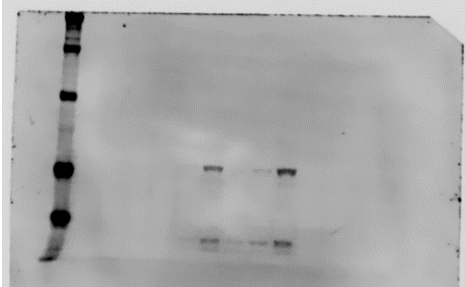

Total STING  
Cell Line: THP-1  
MW: 35 kDa

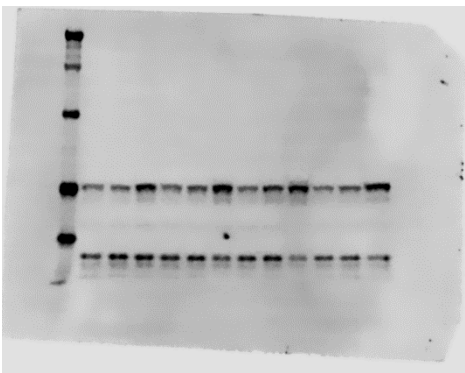

GAPDH  
Cell Line: THP-1  
MW: 36 kDa

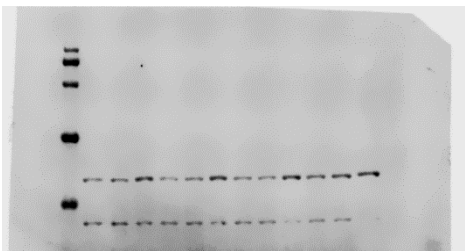

Total STING  
Cell Line: HCC1937  
MW: 35 kDa

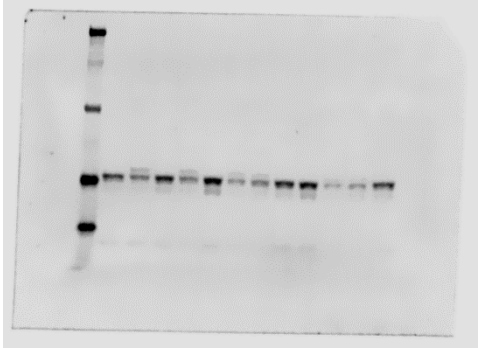

GAPDH  
Cell Line: HCC1937  
MW: 36 kDa

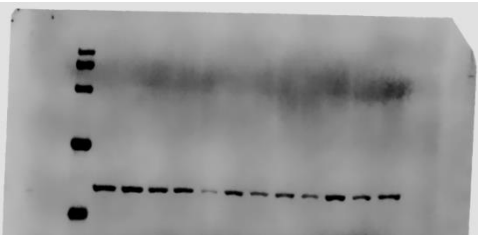

Supplement: s1 [file s1]
